# Supplementary material for: A spiro to ansa rearrangement in cyclotriphosphazene derivatives
Source: Royal Society of Chemistry journal article supplement (doi:10.1039/b703541a), 2007-01-01
Supplement: b703541a.pdf [file b703541a.pdf]

## SUPPLEMENTARY INFORMATION

### Reaction of compound (3) with sodium phenoxide to form 1,1-(2'-amino-1'-ethoxy)-3-phenoxy-3,5,5-trichlorocyclotriphos-phazene (8a)

Compound (3)<sup>5</sup> (3.36 g, 10 mmol) and phenol (0.847 g, 9 mmol) were dissolved in 150 mL of dry THF in a 250 mL three-necked round-bottomed flask. The reaction mixture was cooled in an ice-bath and NaH (60% oil suspension, 0.36 g, 9 mmol) in 10 mL of dry THF quickly added to the stirred solution under an argon atmosphere. The reaction mixture was stirred for a further 20 h at room temperature and the reaction was followed by TLC on silica gel plates using THF-hexane (1:2). The reaction mixture was filtered to remove sodium chloride, the solvent was removed under reduced pressure and the resulting colourless oil subjected to column chromatography using THF-hexane (1:2) as eluant. The product was crystallized from dichloromethane-hexane (1:4) to give white crystals of (8a) (yield 1.82 g, 46%, mp 146<sup>0</sup>C), found: C, 24.47; H, 2.58; N, 14.10%; M, 392. C<sub>8</sub>H<sub>10</sub>Cl<sub>3</sub>N<sub>4</sub>O<sub>2</sub>P<sub>3</sub> requires: C, 24.42; H, 2.56; N, 14.24%; M, 392. <sup>1</sup>H NMR (CDCl<sub>3</sub> solution): δ 4.38 (m, 4H, POCH<sub>2</sub>), 7.26 (m, 1H p-OC<sub>6</sub>H<sub>5</sub>), 7.30 (m, 2H m-OC<sub>6</sub>H<sub>5</sub>), 7.38 (m, 2H o-OC<sub>6</sub>H<sub>5</sub>).

### Reaction of compound (3) with pyrrolidine to form 1,1-(2'-amino-1'-ethoxy)-3-pyrrolidino-3,5,5-trichlorocyclotri-phosphazene (8b)

Pyrrolidine (0.426 g, 6 mmol in 20 ml of dry THF) was added dropwise from an addition funnel to a solution to compound (3)<sup>5</sup> (1.011 g, 3 mmol) dissolved in 20 mL of dry THF in a 100 mL three-necked round-bottomed flask and the reaction was stirred for 24 h at room temperature. The reaction mixture was then filtered, the solvent was removed under reduced pressure and the resulting colourless oil subjected to column chromatography using dichloromethane-hexane (1:1) as eluent. The oily product was crystallized from dichloromethane to give white crystals of (8b) (yield 0.4g, 36%, mp 178<sup>0</sup>C), found: C, 19.44; H, 3.58; N, 18.87 %; M, 371. C<sub>6</sub>H<sub>13</sub>Cl<sub>3</sub>N<sub>5</sub>OP<sub>3</sub> requires: C, 19.45; H, 3.54; N, 18.90 %; M, 369. <sup>1</sup>H NMR (CDCl<sub>3</sub> solution): δ 1.89 (m, 4H, CH<sub>2</sub>), 2.80 (broad d, 1H, NH), 3.26 (m, 2H, NHCH<sub>2</sub>), 3.51 (m, 4H, PNCH<sub>2</sub>), 4.40 (m, 2H, POCH<sub>2</sub>).

### Reaction of compound (4) with sodium phenoxide to form 1,1-(ethane-1',2'-dioxy)-3-phenoxy-3,5,5-trichlorocyclotriphosphazene (8e).

Compound (4)<sup>1</sup> (0.5 g, 1.48 mmol) and phenol (0.14 g, 1.48 mmol) were dissolved in 30 mL of dry THF in a 100 mL three-necked round-bottomed flask. The reaction mixture was cooled in an ice-bath and NaH (60% oil suspension, 0.06 g, 1.48 mmol) in 10 mL of dry THF quickly added to the stirred solution under an argon atmosphere. The reaction mixture was stirred for a further 18 h at room temperature and the reaction was followed by TLC on silica gel plates using THF-hexane (3:1). The reaction mixture was filtered to remove sodium chloride, the solvent was removed under reduced pressure and the resulting colourless oil subjected to column chromatography using THF-hexane (3:1) as eluant. The product was crystallized from dichloromethane-light petroleum ether (40-60<sup>0</sup>C) (2:5) to give white crystals of (8e) (yield 0.42 g, 72%, mp 142<sup>0</sup>C), found: C, 24.40; H, 2.27; N, 10.42%; M, 393. C<sub>8</sub>H<sub>9</sub>Cl<sub>3</sub>N<sub>3</sub>O<sub>3</sub>P<sub>3</sub> requires: C, 24.36; H, 2.30;

N, 10.65%; M, 393. <sup>1</sup>H NMR (CDCl<sub>3</sub> solution): δ 4.38 (m, 4H, POCH<sub>2</sub>), 7.08-7.32 (m, 5H OC<sub>6</sub>H<sub>5</sub>).

### Reaction of compound (4) with pyrrolidine to form 1,1-(ethane-1',2'-dioxy)-3-pyrrolidino-3,5,5-trichlorocyclotriphosphazene (8f).

Compound (4)<sup>1</sup> (0.5 g, 1.48 mmol) dissolved in 20 mL of dry THF in a 100 mL three-necked round-bottomed flask. The reaction mixture was cooled in an ice-bath and NaH (60% oil suspension, 0.06 g, 1.48 mmol) in 10 mL of dry THF quickly added to the stirred solution under an argon atmosphere. Pyrrolidine (0.11 g, 1.48 mmol in 20 ml of dry THF) was added dropwise from an addition funnel to the solution and the reaction was stirred for a further 24 h at room temperature. The reaction mixture was then filtered, the solvent was removed under reduced pressure and the resulting colourless oil subjected to column chromatography using dichloromethane-hexane (3:1) as eluent. The oily product was crystallized from dichloromethane to give white crystals of (8f) (yield 1.2 g, 22%, mp 143<sup>0</sup>C), found: C, 19.44; H, 3.22; N, 15.01%; M, 369. C<sub>6</sub>H<sub>12</sub>Cl<sub>3</sub>N<sub>4</sub>O<sub>2</sub>P<sub>3</sub> requires: C, 19.40; H, 3.26; N, 15.08%; M, 370. <sup>1</sup>H NMR (CDCl<sub>3</sub> solution): δ 1.89 (m, 4H, CH<sub>2</sub>), 3.17 (m, 4H, PNCH<sub>2</sub>), 4.30 (m, 4H, POCH<sub>2</sub>).

### X-ray crystallography

X-ray structure data were collected by means of combined phi and omega scans on a Bruker-Nonius KappaCCD area detector situated at the window of a rotating anode ( $\lambda_{\text{Mo-K}\alpha} = 0.71073\text{\AA}$ ). The structures were solved by direct methods, SHELXS-97 and refined using SHELXL-97.<sup>22</sup> Hydrogen atoms were included in the refinement, but thermal parameters and geometry were constrained to ride on the atom to which they are bonded. The data were corrected for absorption effects using SORTAV.<sup>23</sup> The diffraction pattern arising from the crystal of 8c examined was found to be a 180° rotation twin about the b axis. The data were integrated as two separate overlapping components and the structure refined against both these components using a batch scale factor to determine the relative contribution (which was found to be 47.6:52.4).

Table S1 Crystal data and refinement parameters for (6a), (8a-c), (8e-f)

|                                            | <b>6a</b>                                                                                    | <b>8a</b>                                                                                   | <b>8b</b>                                                                     | <b>8c</b>                                                                                  | <b>8e</b>                                                                                  | <b>8f</b>                                                                                   |
|--------------------------------------------|----------------------------------------------------------------------------------------------|---------------------------------------------------------------------------------------------|-------------------------------------------------------------------------------|--------------------------------------------------------------------------------------------|--------------------------------------------------------------------------------------------|---------------------------------------------------------------------------------------------|
| Empirical formula                          | C <sub>10</sub> H <sub>22</sub> Cl <sub>2</sub> N <sub>3</sub> O <sub>7</sub> P <sub>3</sub> | C <sub>8</sub> H <sub>10</sub> Cl <sub>3</sub> N <sub>4</sub> O <sub>2</sub> P <sub>3</sub> | C <sub>6</sub> H <sub>13</sub> Cl <sub>3</sub> N <sub>5</sub> OP <sub>3</sub> | C <sub>3</sub> H <sub>7</sub> Cl <sub>3</sub> N <sub>3</sub> O <sub>3</sub> P <sub>3</sub> | C <sub>8</sub> H <sub>9</sub> Cl <sub>3</sub> N <sub>3</sub> O <sub>3</sub> P <sub>3</sub> | C <sub>6</sub> H <sub>12</sub> Cl <sub>3</sub> N <sub>4</sub> O <sub>2</sub> P <sub>3</sub> |
| Formula weight                             | 460.12                                                                                       | 393.46                                                                                      | 370.47                                                                        | 332.38                                                                                     | 394.44                                                                                     | 371.46                                                                                      |
| Crystal system                             | Monoclinic                                                                                   | Monoclinic                                                                                  | Monoclinic                                                                    | Monoclinic                                                                                 | Monoclinic                                                                                 | Monoclinic                                                                                  |
| Space group                                | <i>P2<sub>1</sub>/n</i>                                                                      | <i>P2<sub>1</sub>/c</i>                                                                     | <i>P2<sub>1</sub>/c</i>                                                       | <i>P2<sub>1</sub>/c</i>                                                                    | <i>P2<sub>1</sub>/n</i>                                                                    | <i>P2<sub>1</sub>/c</i>                                                                     |
| a (Å)                                      | 7.9956(2)                                                                                    | 17.2569(12)                                                                                 | 8.231(3)                                                                      | 8.7423(4)                                                                                  | 8.5409(2)                                                                                  | 9.6475(2)                                                                                   |
| b (Å)                                      | 15.7971(5)                                                                                   | 11.0110(8)                                                                                  | 17.426(3)                                                                     | 8.0657(5)                                                                                  | 17.1394(3)                                                                                 | 8.1876(2)                                                                                   |
| c (Å)                                      | 14.8388(4)                                                                                   | 7.9969(4)                                                                                   | 9.8503(16)                                                                    | 17.2362(10)                                                                                | 10.6213(3)                                                                                 | 17.5451(4)                                                                                  |
| α (°)                                      | 90                                                                                           | 90                                                                                          | 90                                                                            | 90                                                                                         | 90                                                                                         | 90                                                                                          |
| β (°)                                      | 101.751(2)                                                                                   | 96.470(6)                                                                                   | 94.76(3)                                                                      | 96.165(4)                                                                                  | 109.5880(10)                                                                               | 98.544(2)                                                                                   |
| γ (°)                                      | 90                                                                                           | 90                                                                                          | 90                                                                            | 90                                                                                         | 90                                                                                         | 90                                                                                          |
| Volume (Å <sup>3</sup> )                   | 1834.97(9)                                                                                   | 1509.86(17)                                                                                 | 1408.1(7)                                                                     | 1208.34(12)                                                                                | 1464.83(6)                                                                                 | 1370.50(5)                                                                                  |
| Z                                          | 4                                                                                            | 4                                                                                           | 4                                                                             | 4                                                                                          | 4                                                                                          | 4                                                                                           |
| Density (calc) (Mg/m <sup>3</sup> )        | 1.666                                                                                        | 1.731                                                                                       | 1.748                                                                         | 1.827                                                                                      | 1.789                                                                                      | 1.800                                                                                       |
| Absorption coefficient (mm <sup>-1</sup> ) | 0.654                                                                                        | 0.929                                                                                       | 0.986                                                                         | 1.145                                                                                      | 0.961                                                                                      | 1.017                                                                                       |
| F(000)                                     | 952                                                                                          | 792                                                                                         | 752                                                                           | 664                                                                                        | 792                                                                                        | 752                                                                                         |
| Crystal size (mm)                          | 0.14 × 0.08 × 0.06                                                                           | 0.20 × 0.18 × 0.04                                                                          | 0.16 × 0.14 × 0.03                                                            | 0.50 × 0.15 × 0.01                                                                         | 0.20 × 0.10 × 0.02                                                                         | 0.50 × 0.20 × 0.20                                                                          |
| θ <sub>max</sub> (°)                       | 27.47                                                                                        | 27.50                                                                                       | 27.50                                                                         | 27.49                                                                                      | 27.50                                                                                      | 27.50                                                                                       |
| Reflections collected                      | 24562                                                                                        | 22583                                                                                       | 18678                                                                         | 2685                                                                                       | 19576                                                                                      | 12031                                                                                       |
| Independent reflections                    | 4192                                                                                         | 3453                                                                                        | 3220                                                                          | 2685                                                                                       | 3352                                                                                       | 3115                                                                                        |
| R(int)                                     | 0.0446                                                                                       | 0.0381                                                                                      | 0.0799                                                                        | 0.0776                                                                                     | 0.0397                                                                                     | 0.0274                                                                                      |
| Final R indices $F^2 > 2\sigma F^2$        | R1 = 0.0358<br>wR2 = 0.0805                                                                  | R1 = 0.0850<br>wR2 = 0.2306                                                                 | R1 = 0.0890<br>wR2 = 0.1635                                                   | R1 = 0.0983<br>wR2 = 0.2467                                                                | R1 = 0.0307<br>wR2 = 0.0760                                                                | R1 = 0.0256<br>wR2 = 0.0638                                                                 |
| Δρ max / min (eÅ <sup>-3</sup> )           | 0.654 / -0.415                                                                               | 1.594 / -0.800                                                                              | 0.507 / -0.569                                                                | 1.415 / -0.771                                                                             | 0.357 / -0.469                                                                             | 0.353 / -0.412                                                                              |

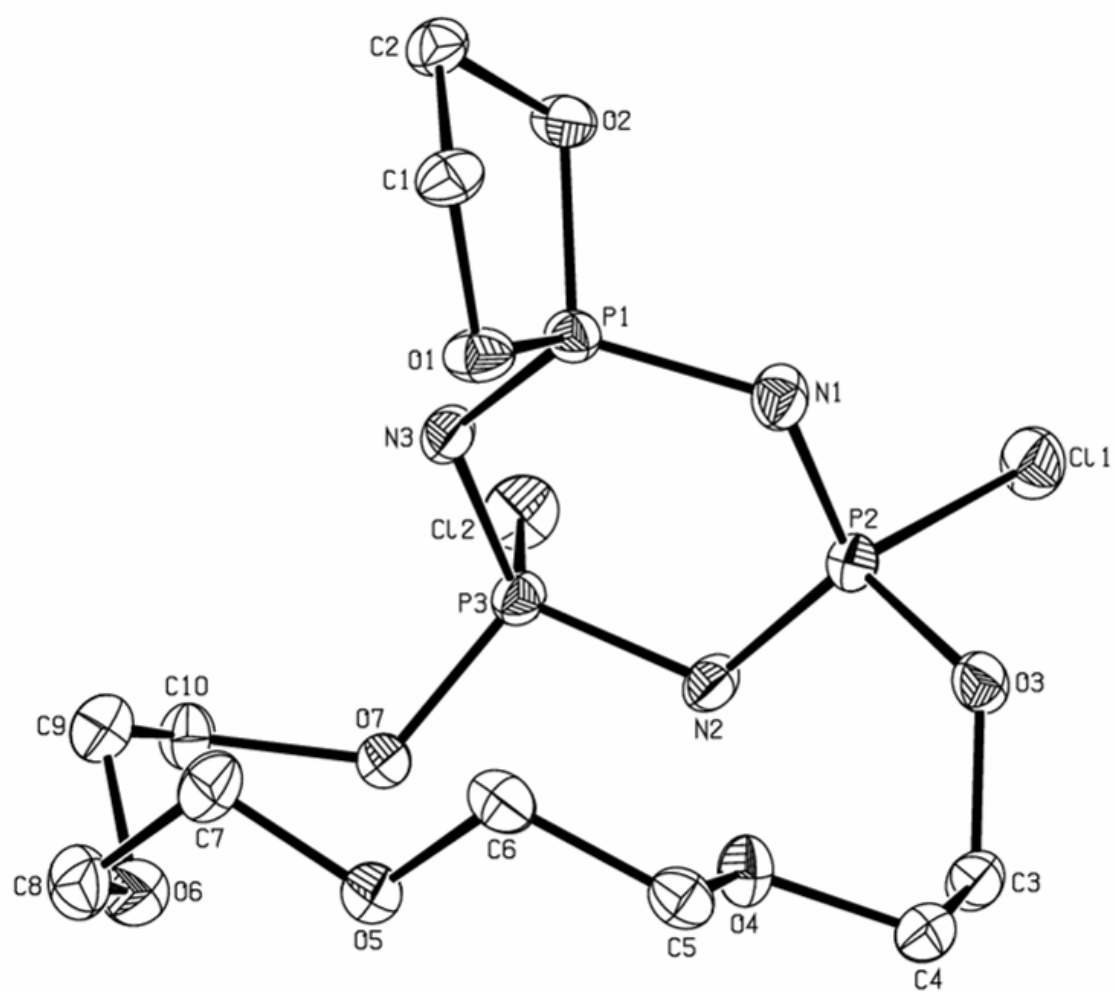

Figure S1. Crystal structure of compound (**6a**) is plotted at 50% probability.

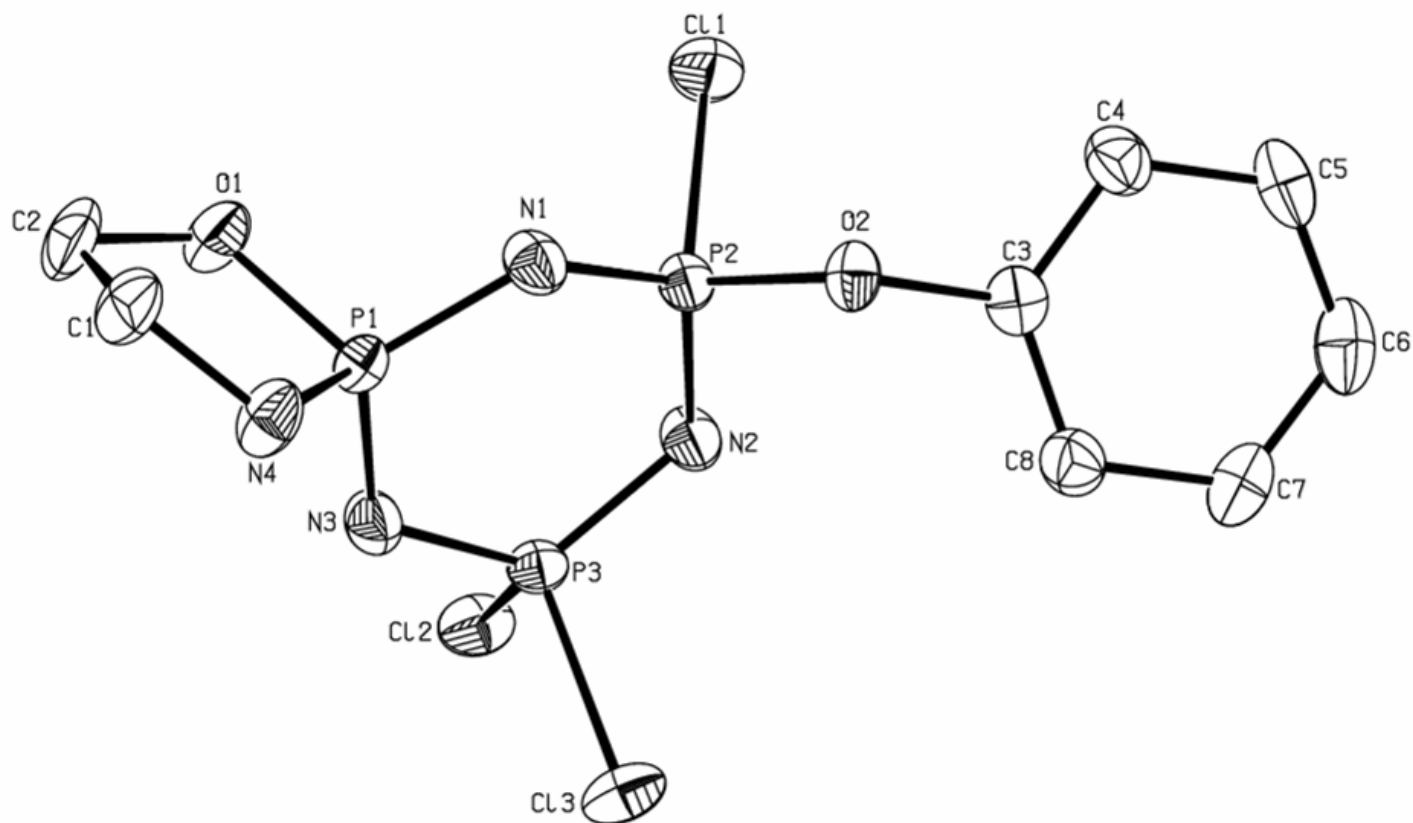

Figure S2. Crystal structure of compound (**8a**) is plotted at 50% probability.

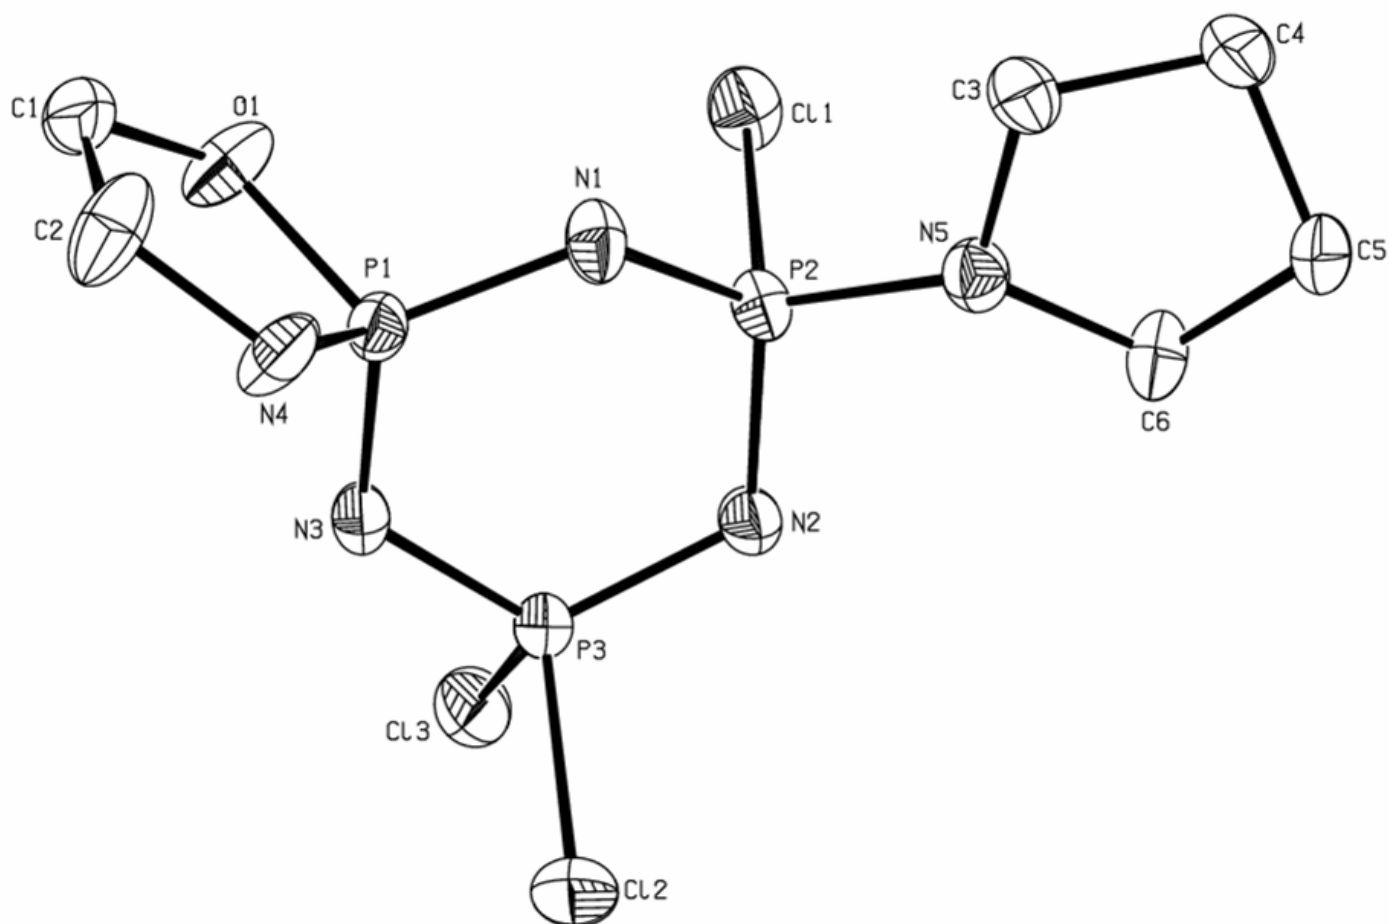

Figure S3. Crystal structure of compound (**8b**) is plotted at 50% probability.

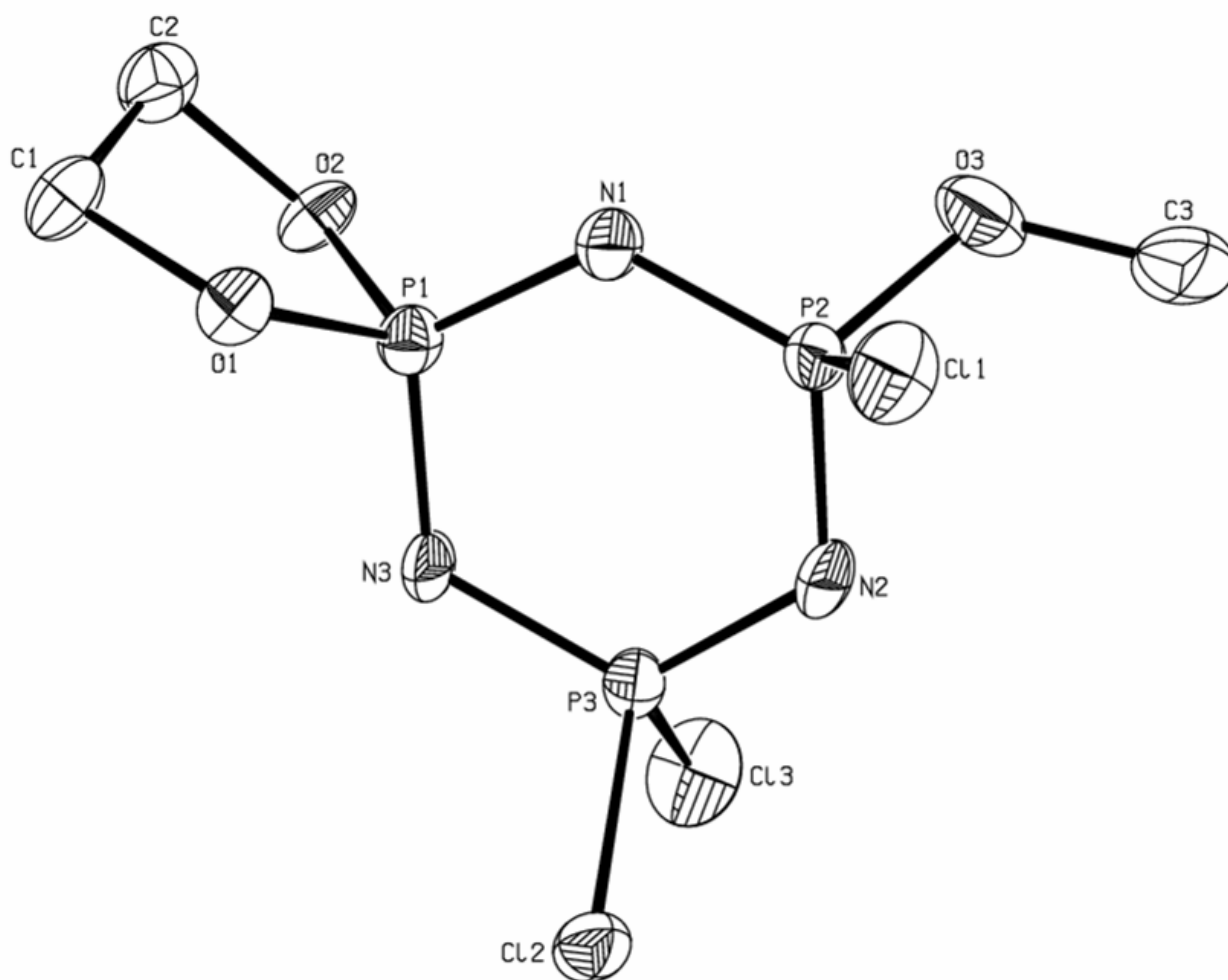

Figure S4. Crystal structure of compound (8c) is plotted at 50% probability.

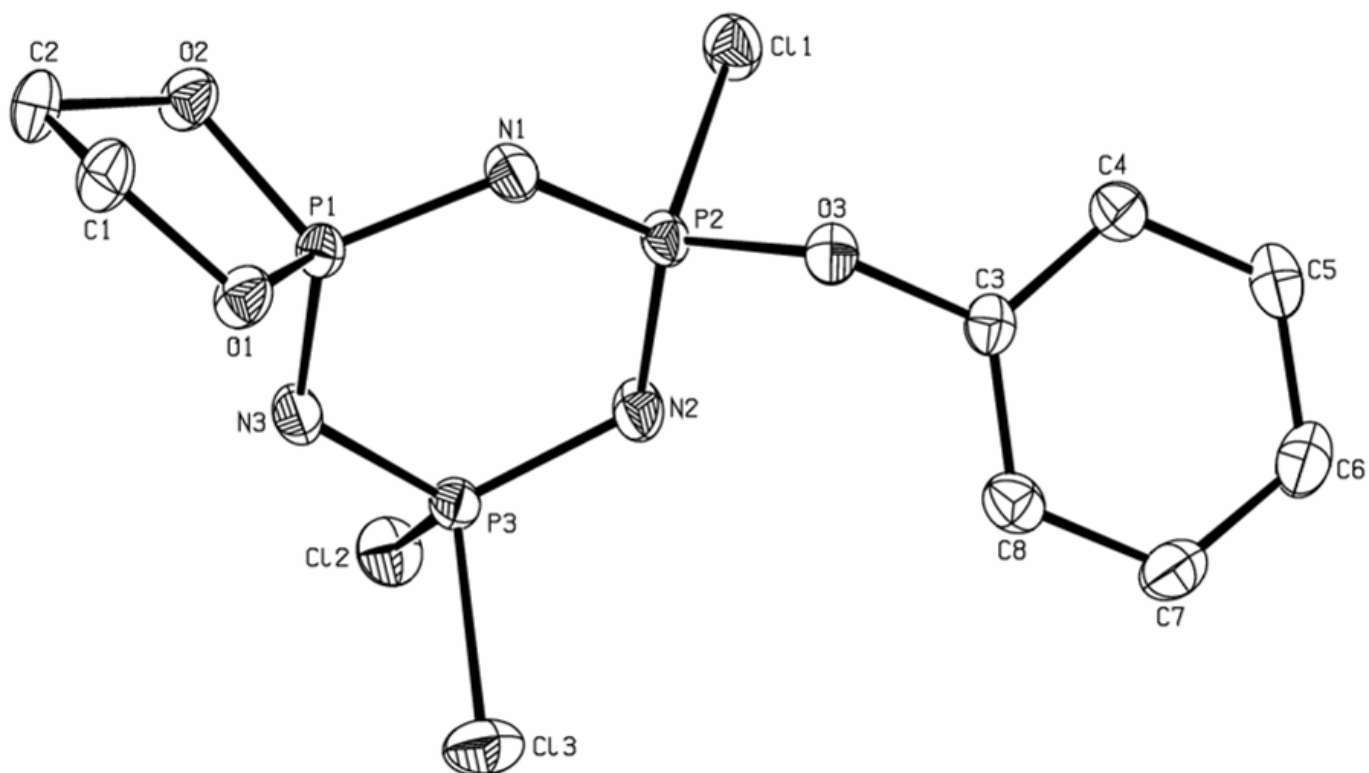

Figure S5. Crystal structure of compound (**8e**) is plotted at 50% probability.

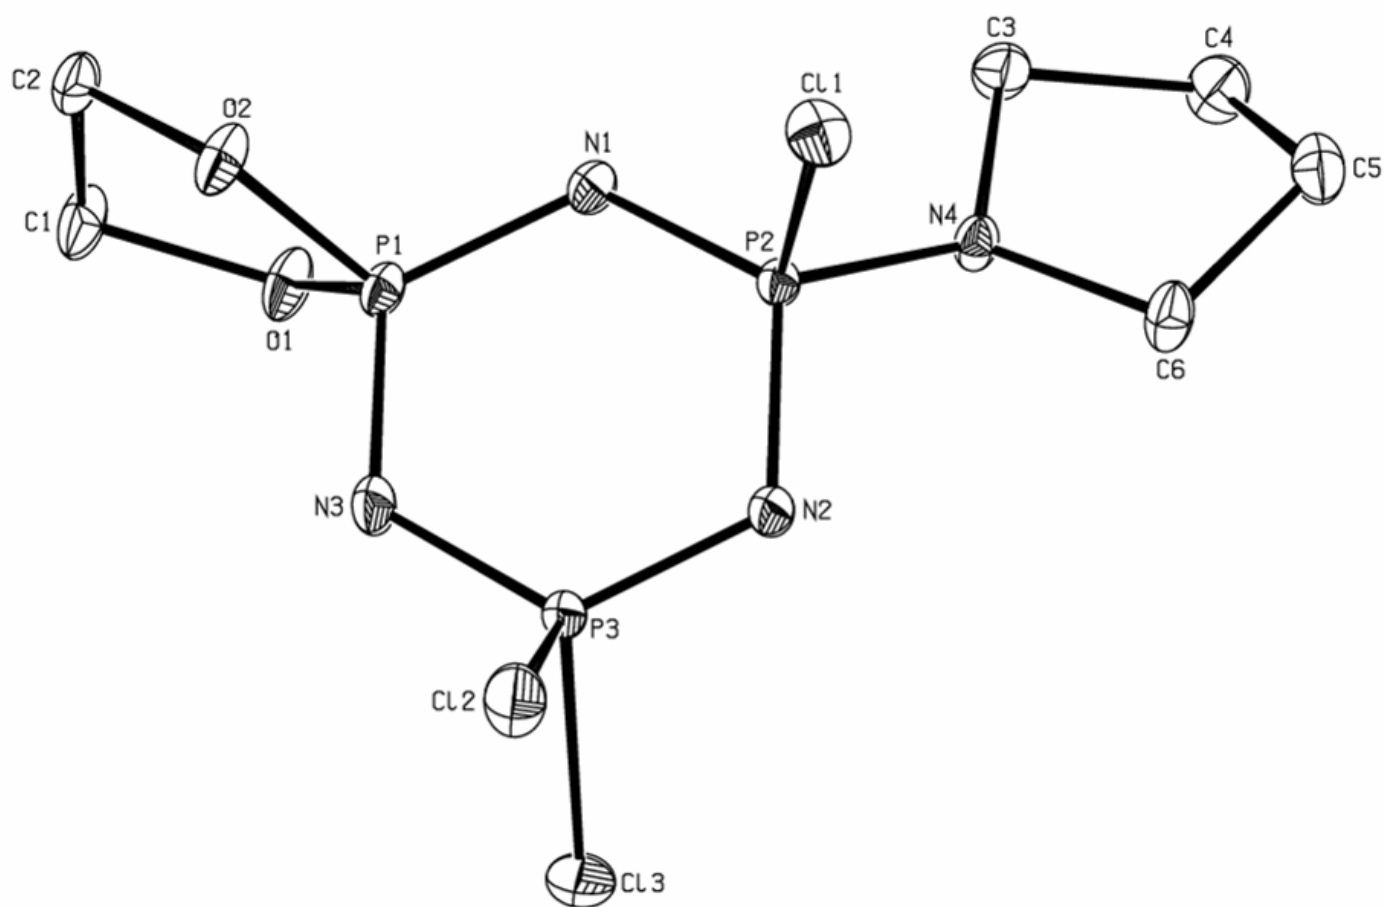

Figure S6. Crystal structure of compound (**8f**) is plotted at 50% probability.
